# Supplementary material for: Serum Vitamin D Metabolites by HPLC-MS/MS Combined with Differential Ion Mobility Spectrometry: Aspects of Sample Preparation without Derivatization
Source: MDPI journal article supplement (doi:10.3390/ijms24098111), 2023-04-30
Supplement: s1 [file s1]

Supporting Information

**Serum vitamin D metabolites by HPLC-MS/MS combined with differential ion mobility spectrometry: Aspects of sample preparation without derivatization**

by

Liliia Usoltseva\*, Vitaliy Ioutsi, Yuriy Panov, Mariya Antsupova, Liudmila Rozhinskaya, Galina Melnichenko and Natalia Mokrysheva

*Endocrinology Research Centre, 117292 Moscow, Russia*

\* Corresponding author Liliia Usoltseva. E-mail address: [usoltseva.liliya@endocrincentr.ru](mailto:usoltseva.liliya@endocrincentr.ru)

All peaks in the MALDI mass spectrum of the extract sample were assigned to the phospholipids and triglycerides species. The assignment was performed using data reported earlier (Table S1) [1].

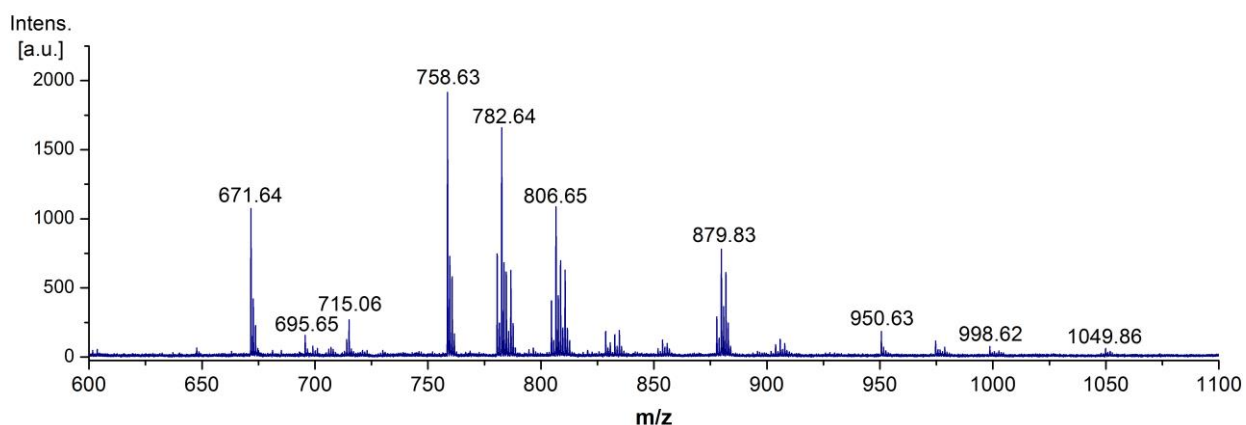

**Figure S1. MALDI mass spectrum of the EtOAc serum extract (DHB).**

**Table S1. Assignment of the MALDI mass-spectrum peaks.**

|    | m/z     | Ion                 | Species | Chain length   |
|----|---------|---------------------|---------|----------------|
| 1  | 671.64  | {M+H} <sup>+</sup>  | SM      | 18:2/14:1      |
| 2  | 695.65  | {M+Na} <sup>+</sup> | SM      | 18:1/14:1      |
| 3  | 758.63  | {M+H} <sup>+</sup>  | PC      | 16:0/18:2      |
| 4  | 760.66  | {M+H} <sup>+</sup>  | PC      | 16:0/18:1      |
| 5  | 780.62  | {M+Na} <sup>+</sup> | PC      | 16:0/18:2      |
| 6  | 782.64  | {M+Na} <sup>+</sup> | PC      | 16:0/18:1      |
| 7  | 784.66  | {M+H} <sup>+</sup>  | PC      | 18:0/18:3      |
| 8  | 786.67  | {M+H} <sup>+</sup>  | PC      | 18:0/18:2      |
| 9  | 804.63  | {M+Na} <sup>+</sup> | PC      | 16:0/20:4      |
| 10 | 806.65  | {M+Na} <sup>+</sup> | PC      | 18:0/18:3      |
| 11 | 808.66  | {M+Na} <sup>+</sup> | PC      | 18:0/18:2      |
| 12 | 828.64  | {M+H} <sup>+</sup>  | PC      | 18:0/21:2      |
| 13 | 830.65  | {M+H} <sup>+</sup>  | PC      | 18:0/21:1      |
| 14 | 832.66  | {M+Na} <sup>+</sup> | PC      | 18:0/20:4      |
| 15 | 834.68  | {M+Na} <sup>+</sup> | PC      | 18:0/20:3      |
| 16 | 851.79  | {M+Na} <sup>+</sup> | TG      | 16:0/16:0/18:3 |
| 17 | 853.80  | {M+Na} <sup>+</sup> | TG      | 16:0/16:0/18:2 |
| 18 | 855.83  | {M+Na} <sup>+</sup> | TG      | 16:0/16:0/18:1 |
| 19 | 877.81  | {M+Na} <sup>+</sup> | TG      | 16:0/18:2/18:2 |
| 20 | 879.83  | {M+Na} <sup>+</sup> | TG      | 16:0/18:1/18:2 |
| 21 | 881.85  | {M+Na} <sup>+</sup> | TG      | 16:0/18:1/18:1 |
| 22 | 901.81  | {M+Na} <sup>+</sup> | TG      | 18:2/18:2/18:2 |
| 23 | 903.84  | {M+Na} <sup>+</sup> | TG      | 18:1/18:2/18:2 |
| 24 | 905.85  | {M+Na} <sup>+</sup> | TG      | 18:0/18:2/18:2 |
| 25 | 907.87  | {M+Na} <sup>+</sup> | TG      | 18:0/18:1/18:2 |
| 26 | 1049.86 | {M+Na} <sup>+</sup> | TG      | 20:0/20:1/24:2 |

\*SM – sphingomyeline, PC – phosphatidylcholine, TG – triglyceride.

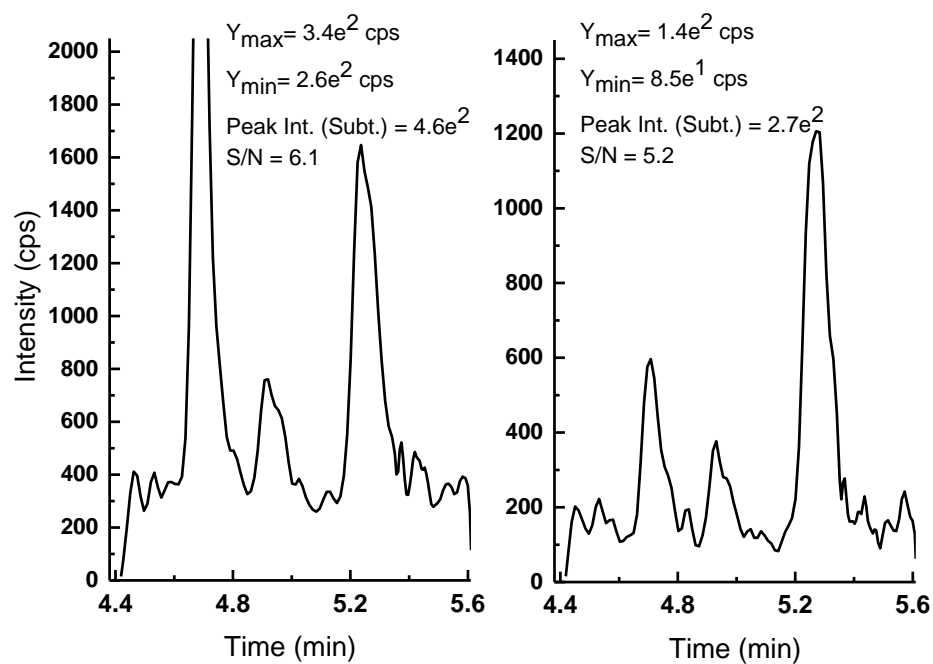

**Figure S2. 1,25(OH)<sub>2</sub>D<sub>3</sub> (tr=4.9 min) extracted ion chromatograms at the limit of detection level (10 pg/ml in serum) for LLE followed by SPE procedure using 450 (left) and 300 µl (right) of serum, Peak to Peak S/N ratios were 6.1 and 5.2, respectively.**

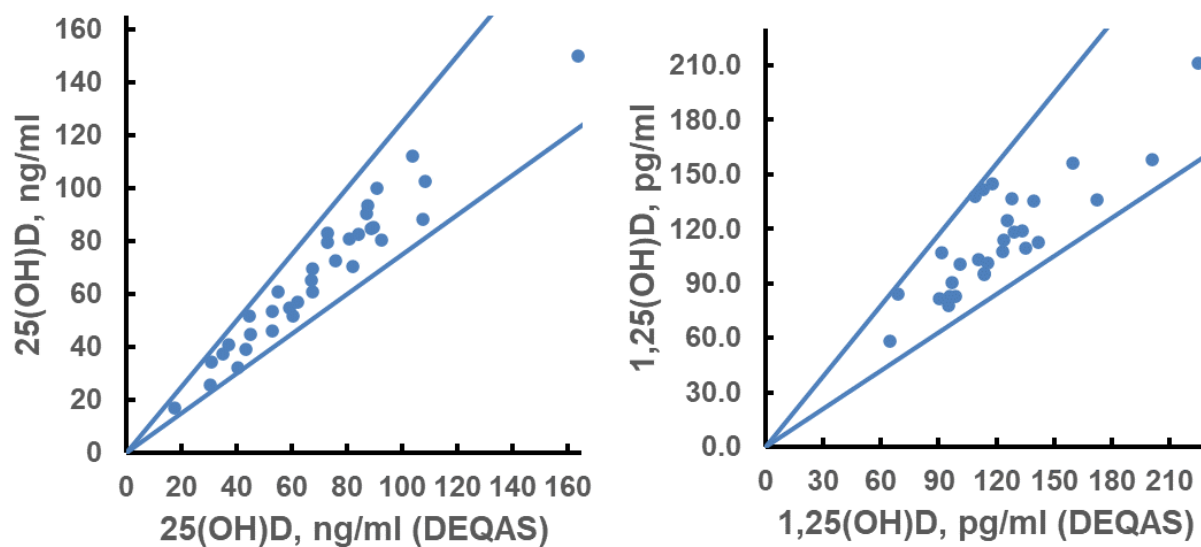

**Figure S3. Comparison between DEQAS data for 1,25(OH)D and 25(OH)D scheme and our lab results. Area between the lines indicates DEQAS acceptable range ( $\pm 30\%$  and  $\pm 25\%$  from the target value).**

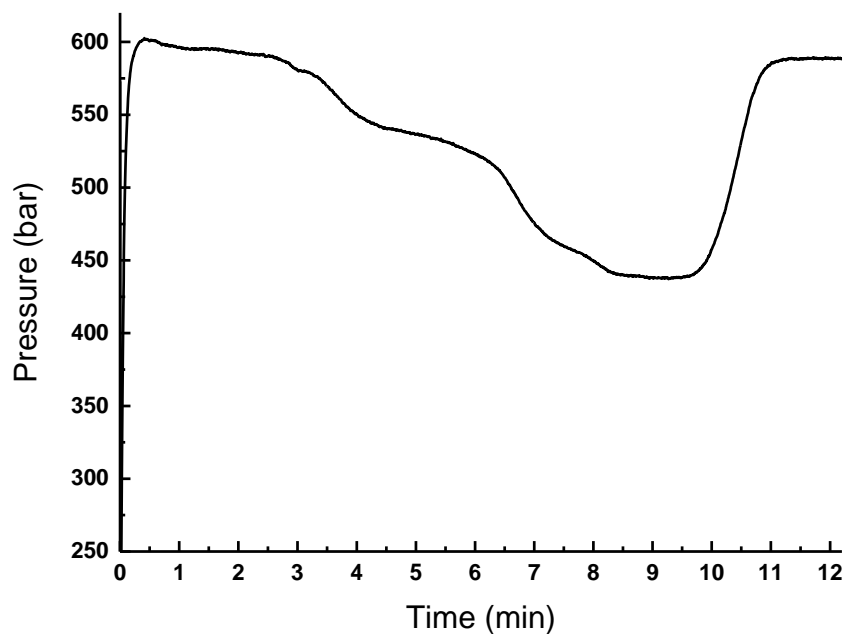

**Figure S4. A typical pressure trace for proposed liquid chromatography gradient (Table 2).**

## References

1. Hori, A.; Yamashita, M.; Yamaura, M.; Hongo, M.; Honda, T.; Hidaka, H. Rapid Quantitative Analysis of Human Serum Sphingomyelin Species Using MALDI-TOF Mass Spectrometry with Lipid Hydrolase Treatment. *Clinica Chimica Acta* **2016**, *453*, 95–99, doi:10.1016/j.cca.2015.09.009.
